# Supplementary material
Source: publisher site journal article supplement (https://www.dovepress.com/article/490732)
Supplement: Supplementary file 1 [file get_supplementary_file.php]

**Supplemental Material**

**Supplementary Table 1** Eligibility Criteria

| **Eligibility Criteria** |
| --- |
| Patients must be ≥18 years of age |
| Written informed consent and written documentation, in accordance with the relevant country and local privacy requirements, had been obtained prior to any study procedures |
| Had used artificial tears for dry eyes within the past year |
| Females of childbearing potential, with a negative pregnancy test result at screening; these patients must have been currently using a reliable form of birth control and have agreed to use a reliable form of birth control for the duration of the study |
| OSDI score of ≥18 and ≤65 (based upon a 0 to 100 scale) at screening and baseline visits |
| Three consecutive Tear Break-Up Time tests ≤10 seconds in at least one eye at screening visit |
| Grade 1 to 4 (modified National Eye Institute Grid, score range = 0 to 5) staining in at least one area of the cornea five areas examined) or conjunctiva (six areas examined) that was related to dry eye in at least one eye at both at screening and baseline visits |
| Was able/agreed to continue to wear existing current spectacle correction during the study period  (if applicable) |
| Currently corrected distance visual acuity of at least 20/32 Snellen equivalent in each eye using the  3-meter LogMar chart, with existing spectacle correction (if necessary) at screening visit |
| If using any form of topical ophthalmic cyclosporine (i.e., RESTASIS®), lifitegrast 5% ophthalmic solution (Xiidra®), patients must be using the drops for ≥90 days prior to the screening visit and plan to continue without change for the duration of the study |
| IOP ≤21 mm Hg in both eyes at screening visit for patients with primary open-angle glaucoma or OHT. Patients with primary open-angle glaucoma or OHT were included provided they were on stable monotherapy bilaterally with IOP controlled (≤21 mm Hg) in both eyes. Any topical IOP-lowering medications must have had a start date of ≥3 months prior to screening visit date and dosage that was not expected to change during the study |
| Was able to follow study instructions and was likely to complete all required visits |

IOP, intraocular pressure; OHT, ocular hypertension.
